# Supplementary material for: Robust analyses for radiographic progression in rheumatoid arthritis
Source: HighWire-hosted journal article supplement (doi:10.1136/rmdopen-2022-002543), 2023-04-01
Supplement: rmdopen-2022-002543supp002_data_supplement.pdf [file rmdopen-2022-002543supp002_data_supplement.pdf]

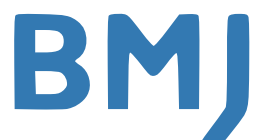**Personal – Addressee Only**

Joshua Brown  
BMJ Operations

13<sup>th</sup> February 2023

Dear Joshua,

**Pay Award 2023**

Further to the recent communication of the 2023 pay award, I'm writing to confirm that your salary has increased to £43934, effective as of 1st January. This will be prorated if you work part time hours, and was included in your February pay, with a backdated payment covering January.

As your salary falls below the median for your Grade, in accordance with BMJ's Move to Median remuneration policy, you have received a further increase of up to 2.5%, capped at the grade median.

Further information about the Pay Award can be found on Hive within People+.

Yours sincerely,

Jennie Heals  
**Director of People and Transformation**
