# Supplementary material for: Robust analyses for radiographic progression in rheumatoid arthritis
Source: HighWire-hosted journal article supplement (doi:10.1136/rmdopen-2022-002543), 2023-04-01
Supplement: rmdopen-2022-002543supp002_data_supplement.pdf [file rmdopen-2022-002543supp002_data_supplement.pdf]

### 'Full' Dataset

**Simulate patient-level mTSS data over time, based on:**

- Linear progression
- Quadratic progression
- A 'forced' group of patients with no progression overtime

**Users parameter values were estimated from recently completed large Phase 3 RA clinical trials<sup>5-7</sup>**

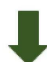

### 'Observed' Dataset and 'Imputed' Dataset

- Consider multiple missing data scenarios: Create patient-level data with missingness – 'Observed' dataset
- Impute "observed" data with 1) LE and 2) LOCF methods to create 'LE' dataset and 'LOCF' dataset (Figure 3)

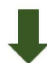

### Analyses Simulated Patient-level Data

- Apply ANCOVA on Full dataset, LE dataset, and LOCF dataset with baseline and treatment arm as predictors (Table 2)
- Apply RC model on Full dataset and Observed dataset (Table 2)

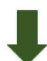

### Compare Methods

- Compare methods on estimating difference between two treatment arms
- Look at bias, RMSE, type 1 error rate/power (Table 3) with 500 simulations

*ANCOVA=analysis of covariance; LE=linear extrapolation; LOCF=last observation carried forward; mTSS=modified total Sharp score; RA=rheumatoid arthritis; RA=random coefficient; RMSE=root mean square error*
